# Supplementary material for: Suicide Deaths Among Adolescent and Young Adult Patients With Cancer
Source: PubMed Central journal article supplement (PMC11536222; doi:10.1001/jamanetworkopen.2024.42964), 2024-11-04
Supplement: jamanetwopen-e2442964-s001.pdf [file jamanetwopen-e2442964-s001.pdf]

## Supplemental Online Content

Matsuo K, Duval CJ, Nanton BA, et al. Suicide deaths among adolescent and young adult patients with cancer. *JAMA Netw Open*. 2024;7(11):e2442964. doi:10.1001/jamanetworkopen.2024.42964

**eMethods. Material and Method.**

**eReferences.**

**eTable. Study Population for Malignancy Sites**

This supplemental material has been provided by the authors to give readers additional information about their work.

### **eMethods. Material and method.**

The University of Southern California Institutional Review Boards deemed the study exempt as it included only publicly available, deidentified data (registration number: HS-16-00481). This retrospective cohort study queried the National Cancer Institute's Surveillance, Epidemiology, and End Results program.<sup>1</sup> Their data capturing mechanism represent more than 97% of new incident cancer cases in the registered area, and the most recent version includes approximately 35% of U.S. populatoins.<sup>2</sup>

We selected patients with cancer diagnosed from 2000-2021 who had died and limited the cohort to the 4,475,284 patients with data on cause of death from 8,687,025 patients (eTable). This approach was to assess suicidal deaths in cancer patients from the different aspect to prior population-level investigation.<sup>3</sup>

The exposure was patient age at cancer diagnosis, grouped into adolescents and young adults (AYA) (15-39 years), adult (40-59 years), and older adult ( $\geq 60$  years). The main outcome was deaths attribute to suicide. The survival data in the program is externally linked to the National Death Index annually.

Suicidal death rates among deceased patients were summarized in each year, and temporal trends assessed according the patient age and sex strata by fitting linear segmented regression models with log-transformation with one-year time increments. The secondary outcomes included cancer type-specific suicidal deaths based on age and sex stratification. Categorization of primary tumor site was based on definitions described by the National Cancer Institute.<sup>4</sup>

Statistic interpretation followed two-tailed hypothesis and a  $P$ -value of less than .05 was defined as statistical significance. Statistical Package for Social Sciences (IBM SPSS, version 29.0, Armonk, NY, USA) was used for the analysis. This study followed the STROBE reporting guidelines for cohort studies.

### **eReferences.**

1. The Surveillance, Epidemiology, and End Results Program. National Cancer Institute. <<<https://seer.cancer.gov/index.html>>> (accessed 6/24/2024).
2. Hicks-Courant K, Ko EM, Matsuo K, Melamed A, Nasioudis D, Rauh-Hain JA, Uppal S, Wright JD, Ramirez PT. Secondary databases in gynecologic cancer research *Int J Gynecol Cancer* 2024;ijgc-2024-005677. doi: 10.1136/ijgc-2024-005677.
3. Yang P, Zhang L, Hou X. Incidence of suicide among adolescent and young adult cancer patients: a population-based study. *Cancer Cell Int*. 2021;21(1):540.
4. Site Recode ICD-O-3 2023 Revision Expanded Definition. Surveillance, Epidemiology, and End Results Program. National Cancer Institute. [https://seer.cancer.gov/siterecode/icdo3\\_2023\\_expanded/](https://seer.cancer.gov/siterecode/icdo3_2023_expanded/) (accessed 6/24/2024).

**eTable. Study population for malignancy site.**

| Malignancy site <sup>a</sup>                                            | No (%)         |
|-------------------------------------------------------------------------|----------------|
| Total                                                                   | 4475284 (100)  |
| Lung And Bronchus                                                       | 880,748 (19.7) |
| Colon And Rectum (Excluding Appendix)                                   | 456,591 (10.2) |
| Prostate                                                                | 416,022 (9.3)  |
| Breast                                                                  | 402,841 (9.0)  |
| Pancreas                                                                | 206,837 (4.6)  |
| Urinary Bladder                                                         | 203,505 (4.5)  |
| Miscellaneous Neoplasms                                                 | 136,663 (3.1)  |
| Melanoma Of The Skin                                                    | 121,850 (2.7)  |
| Kidney Parenchyma                                                       | 120,831 (2.7)  |
| Liver                                                                   | 112,048 (2.5)  |
| Stomach                                                                 | 102,565 (2.3)  |
| Corpus                                                                  | 90,117 (2.0)   |
| Other B-cell leukemia/lymphomas or Lymphoma, NOS                        | 84,640 (1.9)   |
| Plasma Cell Neoplasms                                                   | 78,592 (1.8)   |
| Brain (Malignant)                                                       | 78,491 (1.8)   |
| Large B-cell lymphoma                                                   | 76,539 (1.7)   |
| Ovary                                                                   | 74,877 (1.7)   |
| Esophagus                                                               | 68,517 (1.5)   |
| Myelodysplastic Syndromes                                               | 62,619 (1.4)   |
| Acute Myeloid Leukemias                                                 | 60,245 (1.3)   |
| Chronic lymphocytic leukemia (CLL)/Small lymphocytic lymphoma           | 55,029 (1.2)   |
| Myeloproliferative/Myelodysplastic syndromes, including MDS/MPN overlap | 43,982 (1.0)   |
| Oropharynx                                                              | 39,475 (0.9)   |
| Larynx                                                                  | 38,241 (0.9)   |
| Thyroid                                                                 | 29,490 (0.7)   |
| Soft Tissue                                                             | 29,156 (0.7)   |
| Cervix                                                                  | 29,062 (0.6)   |
| Small Intestine                                                         | 21,446 (0.5)   |
| Gallbladder                                                             | 17,784 (0.4)   |
| Intrahepatic Bile Duct                                                  | 17,063 (0.4)   |
| Anus, Anal Canal And Anorectum                                          | 16,273 (0.4)   |
| Extrahepatic Bile Ducts                                                 | 16,196 (0.4)   |
| Other Non-Epithelial Skin                                               | 16,077 (0.4)   |
| Tongue Anterior                                                         | 15,771 (0.4)   |
| Mesothelioma                                                            | 15,410 (0.3)   |
| Other T and NK-cell leukemias/lymphomas                                 | 14,794 (0.3)   |
| Vulva                                                                   | 12,598 (0.3)   |
| Retroperitoneum And Peritoneum                                          | 12,324 (0.3)   |
| Hodgkin Lymphomas                                                       | 11,628 (0.3)   |
| Digestive Other                                                         | 11,260 (0.3)   |
| Kidney Renal Pelvis                                                     | 11,203 (0.3)   |
| Major Salivary Glands                                                   | 11,090 (0.2)   |
| Precursor Lymphoid Neoplasms                                            | 9,684 (0.2)    |
| Hypopharynx                                                             | 9,066 (0.2)    |
| Other Leukemias                                                         | 8,496 (0.2)    |
| Ampulla Of Vater                                                        | 7,809 (0.2)    |
| Gum                                                                     | 7,203 (0.2)    |
| Ureter                                                                  | 6,951 (0.2)    |
| Floor Of Mouth                                                          | 6,926 (0.2)    |
| Appendix                                                                | 6,740 (0.2)    |
| Bones And Joints                                                        | 6,668 (0.1)    |
| Nasal Cavity And Paranasal Sinuses                                      | 6,539 (0.1)    |
| Nasopharynx                                                             | 6,210 (0.1)    |
| Lip                                                                     | 6,117 (0.1)    |

|                                       |                  |
|---------------------------------------|------------------|
| Eye And Orbit                         | 5,945 (0.1)      |
| Testis                                | 4,771 (0.1)      |
| Vagina                                | 4,620 (0.1)      |
| Kaposi Sarcoma                        | 4,253 (0.1)      |
| Biliary Other                         | 4,101 (0.1)      |
| Fallopian Tube                        | 4,075 (0.1)      |
| Penis                                 | 4,056 (0.1)      |
| Buccal Mucosa                         | 3,152 (0.1)      |
| Pharynx And Oral Cavity Other         | 3,139 (0.1)      |
| Adnexa Other And Genital Female Other | 2,909 (0.1)      |
| Thymus                                | 2,856 (0.1)      |
| Mycosis Fungoides/Sezary Syndrome     | 2,713 (0.1)      |
| Mouth Other                           | 2,479 (0.1)      |
| Adrenal Gland                         | 2,403 (0.1)      |
| Urethra                               | 2,211 (<0.1)     |
| Urinary Other                         | 2,194 (<0.1)     |
| Heart, Mediastinum And Pleura         | 1,969 (<0.1)     |
| Palate Excluding Soft And Uvula       | 1,645 (<0.1)     |
| Meninges (Malignant)                  | 1,218 (<0.1)     |
| CNS Other (Malignant)                 | 1,134 (<0.1)     |
| Sinus Other                           | 1,017 (<0.1)     |
| Genital Male Other                    | 974 (<0.1)       |
| Miscellaneous Hematopoietic Neoplasms | 931 (<0.1)       |
| Trachea, And Respiratory Other        | 790 (<0.1)       |
| Intracranial Gland (Malignant)        | 402 (<0.1)       |
| Parathyroid                           | 226 (<0.1)       |
| Endocrine Other                       | 115 (<0.1)       |
| Placenta                              | 87 (<0.1)        |
| <hr/>                                 |                  |
| Race / ethnicity                      |                  |
| Non-Hispanic White                    | 3,323,503 (74.3) |
| Non-Hispanic Black                    | 466,552 (10.4)   |
| Hispanic                              | 395,643 (8.8)    |
| Asian / Pacific Islander              | 258,107 (5.8)    |
| Native American                       | 26,173 (0.6)     |
| Unknown                               | 5,306 (0.1)      |

<sup>a</sup> Malignancy site according to the 2023 site recode ICD-O-3 revision are shown.
