# Supplementary material for: Suicide Deaths Among Adolescent and Young Adult Patients With Cancer
Source: PubMed Central journal article supplement (PMC11536222; doi:10.1001/jamanetworkopen.2024.42964), 2024-11-04
Supplement: jamanetwopen-e2442964-s002.pdf [file jamanetwopen-e2442964-s002.pdf]

## Data Sharing Statement

Matsuo. Suicide Deaths Among Adolescent and Young Adult Patients With Cancer. *JAMA Netw Open*. Published November 04, 2024. doi:10.1001/jamanetworkopen.2024.42964

### Data

**Data available:** No

### Additional Information

**Explanation for why data not available:** Data sharing statement: The data on which this study is based are National Cancer Institute's Surveillance, Epidemiology, and End Results Program (<https://seer.cancer.gov/>).
